# Supplementary material
Source: MDPI journal article supplement (https://www.mdpi.com/1424-2818/13/5/183)
Supplement: s1 [file s1]

## Article

# Karstic Landscapes Are Foci of Species Diversity in the World's Third-Largest Vertebrate Genus *Cyrtodactylus* Gray, 1827 (Reptilia: Squamata; Gekkonidae)

**Table S1.** Species, habitat preference with supporting references, species group designations, and GenBank accession numbers for specimens used in the SCM analysis. Species can be cross-referenced to Figure 6 by their GenBank no.

| species                           | habitat     | reference                                                                                     | species group         | GenBank no. |
|-----------------------------------|-------------|-----------------------------------------------------------------------------------------------|-----------------------|-------------|
| <i>Cyrtodactylus adorus</i>       | granite     | Shea et al. [1]                                                                               | <i>tuberculatus</i>   | KT363927    |
| <i>C. aequalis</i>                | granite     | Grismer et al. [2]                                                                            | <i>sinyineensis</i>   | MF872275    |
| <i>C. cf. agamensis</i>           | general     | herein                                                                                        | <i>agamensis</i>      | MH248907    |
| <i>C. agusanensis</i>             | general     | Welton et al. [3]                                                                             | <i>philippinicus</i>  | HQ154532    |
| <i>C. albofasciatus</i>           | terrestrial | Agarwal & Karanth [4]                                                                         | <i>triedrus</i>       | KM878625    |
| <i>C. cf. albofasciatus</i>       | terrestrial | herein                                                                                        | <i>triedrus</i>       | JX440521    |
| <i>C. amphipetraeus</i>           | general     | Chomdej et al. [5]                                                                            | <i>sinyineensis</i>   | MT550630    |
| <i>C. angularis</i>               | karst       | Nabhitabhata and Chan-ard [6]                                                                 | <i>angularis</i>      | GU550717    |
| <i>C. annandalei</i>              | terrestrial | Field notes at California Academy of Sciences                                                 | <i>peguensis</i>      | JX440524    |
| <i>C. annulatus</i>               | general     | Brown and Rico [7]; Welton et al. [8]                                                         | <i>philippinicus</i>  | JX678807    |
| <i>C. cf. annulatus</i>           | general     | herein                                                                                        | <i>philippinicus</i>  | GU366085    |
| <i>C. arcanus</i>                 | general     | Oliver et al. [9]                                                                             | <i>arcanus</i>        | JQ820314    |
| <i>C. astrum</i>                  | karst       | Grismer et al. [10]                                                                           | <i>pulchellus</i>     | JX519472    |
| <i>C. atremus</i>                 | trunk       | Kraus and Weijola [11]                                                                        | <i>sermowaiensis</i>  | MN640774    |
| <i>C. aunglini</i>                | karst       | Grismer et al. [12]                                                                           | <i>hasiensis</i>      | MH764589    |
| <i>C. auralensis</i>              | general     | Murdoch et al. [13]                                                                           | <i>intermedius</i>    | KT013127    |
| <i>C. aurensis</i>                | general     | Grismer [14]                                                                                  | <i>philippinicus</i>  | JX440525    |
| <i>C. auribalteatus</i>           | karst       | Ellis and Pauwels [15]; Sumontha et al. [16]                                                  | <i>chauquangensis</i> | AP018116    |
| <i>C. australotitiwangsaensis</i> | granite     | Grismer et al. [10]                                                                           | <i>pulchellus</i>     | JX519484    |
| <i>C. ayeerwadyensis</i>          | general     | Mahony et al. [17]                                                                            | <i>hasiensis</i>      | JX440526    |
| <i>C. badenensis</i>              | cave        | Nguyen et al. [18]                                                                            | <i>orphan</i>         | MT953468    |
| <i>C. baluensis</i>               | trunk       | Hikida [19]                                                                                   | <i>philippinicus</i>  | GU366079    |
| <i>C. bansocensis</i>             | karst       | Luu et al. [20]                                                                               | <i>angularis</i>      | MT953469    |
| <i>C. battalensis</i>             | general     | Khan [21]                                                                                     | <i>lawderanus</i>     | KC151984    |
| <i>C. cf. battalensis</i>         | general     | here                                                                                          | <i>lawderanus</i>     | KC151983    |
| <i>C. batucolus</i>               | granite     | Grismer et al. [22]                                                                           | <i>darmandvillei</i>  | JQ889178    |
| <i>C. bayinnyiensis</i>           | karst       | Grismer et al. [23]                                                                           | <i>sinyineensis</i>   | MH198647    |
| <i>C. bichnganae</i>              | karst       | Ngo and Grismer [24]                                                                          | <i>chauquangensis</i> | MF169953    |
| <i>C. bidoupimontis</i>           | trunk       | Nazarov et al. [25]                                                                           | <i>irregularis</i>    | MT953470    |
| <i>C. bintangrendah</i>           | granite     | Grismer et al. [10]                                                                           | <i>pulchellus</i>     | JX519487    |
| <i>C. bintangtinggi</i>           | granite     | Grismer et al. [10]                                                                           | <i>pulchellus</i>     | JX519494    |
| <i>C. biordinis</i>               | arboreal    | Brown and McCoy [26]                                                                          | <i>orphan</i>         | MF673951    |
| <i>C. borbrovi</i>                | karst       | Nguyen et al. [27]                                                                            | <i>chauquangensis</i> | MT953471    |
| <i>C. bokorensis</i>              | general     | Murdoch et al. [13]                                                                           | <i>intermedius</i>    | KT013147    |
| <i>C. boreoclivus</i>             | trunk       | Oliver et al. [28]; herein                                                                    | <i>capreoloides</i>   | JQ820307    |
| <i>C. brevidactylus</i>           | terrestrial | Field notes at California Academy of Sciences; Myint Kyaw Thura. Personal communication, 2019 | <i>hasiensis</i>      | JX440527    |
| <i>C. brevipalmatus</i>           | arboreal    | Grismer [29–30]                                                                               | <i>brevipalmatus</i>  | MT953472    |
| <i>C. cf. brevipalmatus</i>       | arboreal    | herein                                                                                        | <i>brevipalmatus</i>  | MT468899    |

|                              |             |                                               |                       |            |
|------------------------------|-------------|-----------------------------------------------|-----------------------|------------|
| <i>C. cf. brevipalmatus</i>  | arboreal    | herein                                        | <i>brevipalmatus</i>  | USMHC 2555 |
| <i>C. bugiamapensis</i>      | general     | Nazarov et al. [25]                           | <i>irregularis</i>    | MT953473   |
| <i>C. calamei</i>            | karst       | Luu et al. [20]                               | <i>angularis</i>      | MT953474   |
| <i>C. caovansungi</i>        | general     | Orlov et al. [31]                             | <i>irregularis</i>    | MF169954   |
| <i>C. capreoloides</i>       | general     | Oliver et al. [9]; herein                     | <i>capreoloides</i>   | JQ820310   |
| <i>C. cardamomensis</i>      | general     | Murdoch et al. [13]                           | <i>intermedius</i>    | KT013115   |
| <i>C. cattienensis</i>       | general     | Geissler et al. [32]                          | <i>irregularis</i>    | MF169956   |
| <i>C. cf. cattienensis</i>   | general     | B. L. Stuart. Personal communication, 2019    | <i>irregularis</i>    | MW713947   |
| <i>C. cf. cattienensis</i>   | general     | Ostrowski et al. [37]                         | <i>irregularis</i>    | MW713948   |
| <i>C. cavernicolus</i>       | karst       | Hikida [19]                                   | <i>philippinus</i>    | JX440528   |
| <i>C. cayuensis</i>          | general     | Che et al. [33]                               | <i>khasiensis</i>     | MW792058   |
| <i>C. chamba</i>             | granite     | Agarwal et al. [34]                           | <i>lawderanus</i>     | KM255191   |
| <i>C. chanhomeae</i>         | karst       | Ellis and Pauwels [15]; Bauer et al. [35]     | <i>angularis</i>      | JX440529   |
| <i>C. chaunghanakwaensis</i> | karst       | Grismer et al. [2]                            | <i>sinyineensis</i>   | MH198644   |
| <i>C. chauquangensis</i>     | karst       | Quang et al. [36]                             | <i>chauquangensis</i> | MT953475   |
| <i>C. chrysopylos</i>        | karst       | Grismer et al. [12]                           | <i>khasiensis</i>     | MH764601   |
| <i>C. collegalensis</i>      | terrestrial | Mirza et al. [38]; Agarwal and Karanth [4]    | <i>triedrus</i>       | KX632365   |
| <i>C. condorensis</i>        | granite     | Grismer and Grismer [39]                      | <i>condorensis</i>    | KT013196   |
| <i>C. cf. consobrinus</i>    | trunk       | Hikida [19]; Grismer [30]                     | <i>malayanus</i>      | GU550725   |
| <i>C. cf. consobrinus</i>    | trunk       | herein                                        | <i>malayanus</i>      | JX440528   |
| <i>C. crustulus</i>          | general     | Oliver et al. [40]                            | <i>sermowaiensis</i>  | MN640776   |
| <i>C. cryptus</i>            | general     | Heidrich et al. [41]                          | <i>irregularis</i>    | MT953476   |
| <i>C. cucdongensis</i>       | granite     | Schneider et al. [42]                         | <i>irregularis</i>    | MF169959   |
| <i>C. cucphuongsensis</i>    | karst       | Ngo and Chan [43]                             | <i>chauquangensis</i> | MT953477   |
| <i>C. culaochamensis</i>     | granite     | Ngo et al. [44]                               | <i>irregularis</i>    | KT013199   |
| <i>C. dammathetensis</i>     | karst       | Grismer et al. [2]                            | <i>sinyineensis</i>   | MF872277   |
| <i>C. darevskii</i>          | karst       | Nazarov et al. [45]                           | <i>angularis</i>      | MT953478   |
| <i>C. darmandvillei</i>      | general     | Auffenberg [46]                               | <i>darmandvillei</i>  | KU232615   |
| <i>C. cf. darmandvillei</i>  | general     | Riyanto et al. [47]                           | <i>darmandvillei</i>  | KU232616   |
| <i>C. cf. darmandvillei</i>  | general     | Riyanto et al. [47]                           | <i>darmandvillei</i>  | KU232618   |
| <i>C. cf. darmandvillei</i>  | general     | Riyanto et al. [47]                           | <i>darmandvillei</i>  | KU232617   |
| <i>C. cf. darmandvillei</i>  | general     | Riyanto et al. [47]                           | <i>darmandvillei</i>  | KU232623   |
| <i>C. dati</i>               | general     | Ngo [48]                                      | <i>irregularis</i>    | KT013104   |
| <i>C. dattkyaik</i>          | karst       | Grismer et al. [49]                           | <i>sinyineensis</i>   | MN534902   |
| <i>C. dayangbuntingensis</i> | karst       | Quah et al. [50]                              | <i>pulchellus</i>     | MN125090   |
| <i>C. deccanensis</i>        | terrestrial | Agarwal and Karanth [4]                       | <i>triedrus</i>       | KM878615   |
| <i>C. cf. deccanensis</i>    | terrestrial | herein                                        | <i>triedrus</i>       | KM878628   |
| <i>C. doisuthep</i>          | granite     | Kunya et al. [51]                             | <i>chauquangensis</i> | MT550626   |
| <i>C. dumnuui</i>            | karst       | Bauer et al. [52]                             | <i>chauquangensis</i> | MW713972   |
| <i>C. durio</i>              | arboreal    | Grismer et al. [53]                           | <i>lateralis</i>      | KU893159   |
| <i>C. eisenmanae</i>         | cave        | Ngo and Bauer [54]                            | <i>condorensis</i>    | JX440534   |
| <i>C. elok</i>               | arboreal    | Grismer [29–30]; Dring [55]                   | <i>lateralis</i>      | JQ889180   |
| <i>C. epiroticus</i>         | trunk       | Kraus [56]                                    | <i>louisianensis</i>  | JX440535   |
| <i>C. equestris</i>          | trunk       | Oliver et al. [57]; herein                    | <i>novaequineae</i>   | KT835458   |
| <i>C. erythropis</i>         | karst       | Bauer et al. [58]                             | <i>chauquangensis</i> | MW713958   |
| <i>C. evanquahi</i>          | karst       | Wood et al. [59]                              | <i>pulchellus</i>     | MN586889   |
| <i>C. fasciolatus</i>        | general     | Husain and Ray [60]                           | <i>fasciolatus</i>    | KM255184   |
| <i>C. cf. fasciolatus</i>    | general     | I. Agarwal. Personal communication, 2019      | <i>fasciolatus</i>    | KM255185   |
| <i>C. fraenatus</i>          | general     | Batuwita and Bahir [61]                       | <i>triedrus</i>       | MW713940   |
| <i>C. gansi</i>              | general     | Field notes at California Academy of Sciences | <i>khasiensis</i>     | JX440537   |
| <i>C. gialaiensis</i>        | general     | Luu et al. [62]                               | <i>irregularis</i>    | MT953479   |
| <i>C. grimeri</i>            | cave        | Ngo and Bauer [54]                            | <i>condorensis</i>    | JX440538   |

|                              |             |                                                                                   |                       |          |
|------------------------------|-------------|-----------------------------------------------------------------------------------|-----------------------|----------|
| <i>C. guakanthanensis</i>    | karst       | Grismer et al. [63]                                                               | <i>sworderi</i>       | KU253576 |
| <i>C. gubaot</i>             | general     | Welton et al. [64]                                                                | <i>philippinicus</i>  | KU309336 |
| <i>C. gubernatoris</i>       | general     | Annandale [65]                                                                    | <i>peguensis</i>      | KM255204 |
| <i>C. gunungsenyumensis</i>  | karst       | Grismer et al. [66]                                                               | <i>sworderi</i>       | KU253584 |
| <i>C. guwahatiensis</i>      | general     | Agarwal et al. [67]                                                               | <i>khasiensis</i>     | KM255194 |
| <i>C. halbeii</i>            | general     | Mirza et al. [68]                                                                 | <i>khasiensis</i>     | MT341524 |
| <i>C. cf. halbeii</i>        | general     | I. Agarwal (Personal Communication 2019)                                          | <i>khasiensis</i>     | KM255193 |
| <i>C. hidupselamanya</i>     | karst       | Grismer et al. [69]                                                               | <i>pulchellus</i>     | KX011420 |
| <i>C. himalayanus</i>        | general     | Duda and Sahi [70]; I. Agarwal. Personal communication, 2019                      | <i>lawderanus</i>     | KM255187 |
| <i>C. hinnamnoensis</i>      | karst       | Luu et al. [20]                                                                   | <i>angularis</i>      | MT953480 |
| <i>C. hontreensis</i>        | cave        | Ngo et al. [71]                                                                   | <i>intermedius</i>    | JX440539 |
| <i>C. hoskini</i>            | granite     | Shea et al. [1]; Reidel et al. [72]                                               | <i>tuberculatus</i>   | KT363931 |
| <i>C. houaphanensis</i>      | karst       | Schneider et al. [73]                                                             | <i>chauquangensis</i> | MW792067 |
| <i>C. huongsonensis</i>      | karst       | Luu et al. [74]                                                                   | <i>chauquangensis</i> | MT953481 |
| <i>C. huynhi</i>             | granite     | Ngo and Bauer [75]                                                                | <i>irregularis</i>    | MF169963 |
| <i>C. ingeri</i>             | trunk       | Hikida [19]                                                                       | <i>philippinicus</i>  | MN884158 |
| <i>C. interdigitalis</i>     | arboreal    | Ellis and Pauwels [15]; Ulber [76]; Nabhitabhata and Chan-ard [6]; Luu et al [20] | <i>brevipalmatus</i>  | MW792061 |
| <i>C. cf. interdigitalis</i> | arboreal    | herein                                                                            | <i>brevipalmatus</i>  | MT468902 |
| <i>C. cf. interdigitalis</i> | arboreal    | herein                                                                            | <i>brevipalmatus</i>  | MT468909 |
| <i>C. cf. interdigitalis</i> | arboreal    | herein                                                                            | <i>brevipalmatus</i>  | JQ889181 |
| <i>C. intermedius</i>        | general     | Murdoch et al. [13]                                                               | <i>intermedius</i>    | KT013138 |
| <i>C. cf. intermedius 1</i>  | general     | herein                                                                            | <i>intermedius</i>    | GU550210 |
| <i>C. cf. intermedius 2</i>  | general     | herein                                                                            | <i>intermedius</i>    | KT013117 |
| <i>C. cf. intermedius 3</i>  | general     | herein                                                                            | <i>intermedius</i>    | JX519469 |
| <i>C. inthanon</i>           | granite     | Kunya et al. [77]                                                                 | <i>sinyineensis</i>   | MT550625 |
| <i>C. irregularis</i>        | general     | Nazarov et al. [78, 25]                                                           | <i>irregularis</i>    | JX041341 |
| <i>C. jaegeri</i>            | karst       | Luu et al. [79]                                                                   | <i>angularis</i>      | MT953482 |
| <i>C. jaintiaensis</i>       | general     | Agarwal et al. [67]                                                               | <i>khasiensis</i>     | KM255195 |
| <i>C. jambangan</i>          | general     | Welton et al. [64]                                                                | <i>philippinicus</i>  | GU366102 |
| <i>C. jarakensis</i>         | general     | Grismer et al. [22]                                                               | <i>agamensis</i>      | MF169965 |
| <i>C. jarujini</i>           | karst       | Ellis and Pauwels [15]; Sumontha et al. [80]                                      | <i>angularis</i>      | JX440541 |
| <i>C. jelawangensis</i>      | granite     | Grismer et al. [81]                                                               | <i>pulchellus</i>     | KJ659852 |
| <i>C. jellesmae</i>          | general     | Hayden et al. [82]                                                                | <i>darmandvillei</i>  | JX440542 |
| <i>C. jeyporensis</i>        | terrestrial | Agarwal and Karanth [4]                                                           | <i>triedrus</i>       | KM878616 |
| <i>C. kazirangaensis</i>     | general     | Agarwal et al. [67]                                                               | <i>khasiensis</i>     | KM255170 |
| <i>C. khasiensis</i>         | general     | Li [83]                                                                           | <i>khasiensis</i>     | KM255188 |
| <i>C. kimberleyensis</i>     | general     | Bauer and Doughty [84]                                                            | <i>darmandvillei</i>  | JX440544 |
| <i>C. kingsadai</i>          | granite     | Ziegler et al. [85]                                                               | <i>irregularis</i>    | MT953483 |
| <i>C. klugei</i>             | trunk       | herein                                                                            | <i>lousiadensis</i>   | HQ401197 |
| <i>C. kohrongensis</i>       | general     | Grismer et al. [86]                                                               | <i>intermedius</i>    | KT013124 |
| <i>C. kulenensis</i>         | sandstone   | Geissler et al. [87]                                                              | <i>intermedius</i>    | MW717585 |
| <i>C. laangensis</i>         | karst       | Murdoch et al. [13]                                                               | <i>intermedius</i>    | KT013158 |
| <i>C. langkawiensis</i>      | karst       | Grismer et al. [10]                                                               | <i>pulchellus</i>     | JX519502 |
| <i>C. lateralis</i>          | arboreal    | Harvey et al. [88]                                                                | <i>lateralis</i>      | KU893162 |
| <i>C. lawderanus</i>         | terrestrial | I. Agarwal. Personal communication, 2019                                          | <i>lawderanus</i>     | KM255190 |
| <i>C. leegrimeri</i>         | general     | Chan and Norhayati [89]                                                           | <i>condorensis</i>    | KT013201 |
| <i>C. lekaguli</i>           | karst       | Grismer et al. [10]                                                               | <i>pulchellus</i>     | KX011425 |
| <i>C. lenggongensis</i>      | karst       | Grismer et al. [69]                                                               | <i>pulchellus</i>     | JX519488 |
| <i>C. lenya</i>              | karst       | Connette et al. [90]                                                              | <i>oldhami</i>        | KY041653 |
| <i>C. limajalur</i>          | karst       | Davis et al. [91]                                                                 | <i>malayanus</i>      | MK477177 |
| <i>C. linnoensis</i>         | karst       | Grismer et al. [2]                                                                | <i>yathepyanensis</i> | MF872295 |

|                             |             |                                     |                       |          |
|-----------------------------|-------------|-------------------------------------|-----------------------|----------|
| <i>C. linnwayensis</i>      | karst       | Grismer et al. [2]                  | <i>linnwayensis</i>   | MF872288 |
| <i>C. lomyenensis</i>       | granite     | Ngo and Pauwels [92]                | <i>angularis</i>      | MF169966 |
| <i>C. cf. loriae</i> Wau    | trunk       | dan Mulyadi [93] Oliver et al. [28] | <i>loriae</i>         | JQ820299 |
| <i>C. cf. loriae</i> Bunisi | trunk       | herein                              | <i>loriae</i>         | HQ401209 |
| <i>C. cf. loriae</i> Fane   | trunk       | herein                              | <i>loriae</i>         | MW713976 |
| <i>C. cf. loriae</i> Yuro   | trunk       | herein                              | <i>loriae</i>         | MW713975 |
| <i>C. louisidensis</i>      | trunk       | Kraus [56]; herein                  | <i>louisidensis</i>   | HQ401190 |
| <i>C. macrotuberculatus</i> | general     | Grismer and Norhayti [94]           | <i>pulchellus</i>     | JX519519 |
| <i>C. maelanoi</i>          | general     | Grismer et al. [95]                 | <i>sinyineensis</i>   | MT823267 |
| <i>C. majulah</i>           | swamp       | Grismer et al. [96]                 | <i>agamensis</i>      | JX988529 |
| <i>C. malayanus</i>         | trunk       | Hikida [19]; Grismer [30]           | <i>malayanus</i>      | GU550733 |
| <i>C. cf. malayanus</i>     | trunk       | herein                              | <i>malayanus</i>      | MK477176 |
| <i>C. cf. malayanus</i>     | trunk       | herein                              | <i>malayanus</i>      | MK477159 |
| <i>C. cf. malayanus</i>     | trunk       | herein                              | <i>malayanus</i>      | MK477180 |
| <i>C. mamanwa</i>           | general     | herein                              | <i>philippinus</i>    | GU550820 |
| <i>C. manos</i>             | general     | Oliver et al. [9]                   | <i>arcanus</i>        | JQ820322 |
| <i>C. marmoratus</i>        | general     | dan Mulyadi [93]                    | <i>marmoratus</i>     | JX440546 |
| <i>C. cf. matsuii</i>       | trunk       | Davis et al. [97]                   | <i>philippinus</i>    | MN884159 |
| <i>C. mcdonaldi</i>         | karst       | Shea et al. [1]                     | <i>tuberculatus</i>   | HQ401139 |
| <i>C. medioclivus</i>       | general     | Oliver et al. [9]; herein           | <i>capreoloides</i>   | JQ820294 |
| <i>C. meersi</i>            | terrestrial | Grismer et al. [98]                 | <i>peguensis</i>      | MH624104 |
| <i>C. metropolis</i>        | karst       | Grismer et al. [99]                 | <i>agamensis</i>      | KU253578 |
| <i>C. mimikanus</i>         | general     | Brown and Parker [100]; herein      | <i>novaeguineae</i>   | JQ820316 |
| <i>C. minor</i>             | general     | Oliver et al. [9]                   | <i>capreoloides</i>   | JQ820318 |
| <i>C. mombergi</i>          | general     | Grismer et al. [101]                | <i>khasiensis</i>     | MN059869 |
| <i>C. montanus</i>          | general     | Agarwal et al. [67]                 | <i>khasiensis</i>     | KM255200 |
| <i>C. muanfuangensis</i>    | karst       | Sitthivong et al. [102]             | <i>angularis</i>      | MW792068 |
| <i>C. multiporus</i>        | karst       | Nazarov et al. [45]                 | <i>angularis</i>      | MT953484 |
| <i>C. muluensis</i>         | karst       | Davis et al. [91]                   | <i>philippinus</i>    | MK477167 |
| <i>C. murua</i>             | trunk       | Kraus and Allison [103]             | <i>louisidensis</i>   | KT363953 |
| <i>C. myaleiktaung</i>      | karst       | Grismer et al. [12]                 | <i>khasiensis</i>     | MH764589 |
| <i>C. myintkyawthurai</i>   | karst       | Grismer et al. [98]                 | <i>peguensis</i>      | MH624111 |
| <i>C. nagalandensis</i>     | general     | Agarwal et al. [67]                 | <i>khasiensis</i>     | KM255199 |
| <i>C. naungkayaingensis</i> | karst       | Grismer et al. [23]                 | <i>sinyineensis</i>   | MH198664 |
| <i>C. nebulosus</i>         | terrestrial | Agarwal and Karanth [4]             | <i>triedrus</i>       | KM878618 |
| <i>C. cf. nebulosus</i>     | terrestrial | herein                              | <i>triedrus</i>       | KM878619 |
| <i>C. cf. nebulosus</i>     | terrestrial | herein                              | <i>triedrus</i>       | KM878620 |
| <i>C. cf. nebulosus</i>     | terrestrial | herein                              | <i>triedrus</i>       | KM878621 |
| <i>C. ngoiensis</i>         | karst       | Schneider et al. [73]               | <i>chauquangensis</i> | MW792066 |
| <i>C. nigriocularis</i>     | cave        | Nguyen et al. [105]                 | <i>angularis</i>      | MT953485 |
| <i>C. novaeguineae</i>      | trunk       | Oliver et al. [28]                  | <i>novaeguineae</i>   | KT363956 |
| <i>C. nyinyikyawi</i>       | terrestrial | Grismer et al. [106]                | <i>peguensis</i>      | MH624118 |
| <i>C. oldhami</i>           | general     | Nabhitabhata and Chan-ard [6]       | <i>oldhami</i>        | MF872302 |
| <i>C. cf. oldhami</i>       | general     | herein                              | <i>oldhami</i>        | AP018118 |
| <i>C. cf. oldhami</i>       | general     | herein                              | <i>oldhami</i>        | MW713967 |
| <i>C. cf. oldhami</i>       | general     | herein                              | <i>oldhami</i>        | MT468910 |
| <i>C. cf. oldhami</i>       | general     | herein                              | <i>oldhami</i>        | MT468911 |
| <i>C. otai</i>              | karst       | Nguyen et al. [107]                 | <i>chauquangensis</i> | MT953486 |
| <i>C. pageli</i>            | karst       | Schneider et al. [108]              | <i>angularis</i>      | MT953487 |
| <i>C. pantiensis</i>        | swamp       | Grismer et al. [22]                 | <i>agamensis</i>      | JQ889185 |
| <i>C. papuensis</i>         | general     | Brown and Parker [100]              | <i>marmoratus</i>     | JQ820320 |
| <i>C. payacola</i>          | swamp       | Johnson et al. [109]                | <i>agamensis</i>      | JQ889190 |
| <i>C. payarhtanensis</i>    | karst       | Connette et al. [90]                | <i>oldhami</i>        | KY041654 |
| <i>C. peguensis</i>         | terrestrial | Grismer et al. [106]                | <i>peguensis</i>      | MH756190 |

|                                |             |                                                 |                       |          |
|--------------------------------|-------------|-------------------------------------------------|-----------------------|----------|
| <i>C. petani</i>               | general     | Riyanto et al. [110]                            | <i>darmandvillei</i>  | KU232620 |
| <i>C. pharbaungensis</i>       | karst       | Grismer et al. [2]                              | <i>sadansinensis</i>  | MF872303 |
| <i>C. philippinicus</i>        | general     | Brown et al. [111]; Welton et al. [64]          | <i>philippinicus</i>  | GU550895 |
| <i>C. cf. philippinicus</i>    | general     | Brown et al. [111]; Welton et al. [64]          | <i>philippinicus</i>  | GU550825 |
| <i>C. phnomchiensis</i>        | granite     | Neang et al. [112]                              | <i>irregularis</i>    | MT066405 |
| <i>C. phongnhakebangensis</i>  | karst       | Loos et al. [113]                               | <i>angularis</i>      | MF169970 |
| <i>C. phumyensis</i>           | granite     | Ostrowski et al. [114]                          | <i>irregularis</i>    | MW792065 |
| <i>C. phuocbinhensis</i>       | granite     | Nguyen et al. [115]                             | <i>irregularis</i>    | MT953488 |
| <i>C. phuquocensis</i>         | general     | Ngo et al. [116]                                | <i>intermedius</i>    | MF169971 |
| <i>C. pinlaungensis</i>        | karst       | Grismer et al. [117]                            | <i>linnwayensis</i>   | MN030634 |
| <i>C. pronarus</i>             | granite     | Shea et al. [1]                                 | <i>tuberculatus</i>   | HQ401152 |
| <i>C. psarops</i>              | general     | Harvey et al. [118]                             | <i>agamensis</i>      | KR921705 |
| <i>C. pseudoquadrivirgatus</i> | general     | Rösler et al. [119]                             | <i>irregularis</i>    | MF169972 |
| <i>C. pubisulcus</i>           | general     | Hikida [19]                                     | <i>philippinicus</i>  | JX440551 |
| <i>C. cf. pubisulcus</i>       | general     | herein                                          | <i>philippinicus</i>  | MN884152 |
| <i>C. cf. pubisulcus</i>       | general     | herein                                          | <i>philippinicus</i>  | MK477166 |
| <i>C. puhuensis</i>            | general     | Nguyen et al. [120]                             | <i>chauquangensis</i> | MT953489 |
| <i>C. pulchellus</i>           | granite     | Grismer et al. [10]                             | <i>pulchellus</i>     | MF169974 |
| <i>C. pyadalinensis</i>        | terrestrial | Grismer et al. [106]                            | <i>peguensis</i>      | MH624105 |
| <i>C. pyinyaungensis</i>       | terrestrial | Grismer et al. [2]                              | <i>peguensis</i>      | MF872307 |
| <i>C. quadrivirgatus</i>       | general     | Johnson et al. [109]; Grismer [30]              | <i>sworderi</i>       | MF169975 |
| <i>C. raglai</i>               | cave        | Nguyen et al. [121]                             | <i>irregularis</i>    | MW675652 |
| <i>C. ramboda</i>              | trunk       | Batuwita and Bahir [61]                         | <i>triedrus</i>       | MW713939 |
| <i>C. redimiculus</i>          | general     | Brown and Dimalibot [122]                       | <i>philippinicus</i>  | GU550738 |
| <i>C. rex</i>                  | trunk       | Oliver et al. [57]; herein                      | <i>novaequineae</i>   | KT835460 |
| <i>C. rishivalleyensis</i>     | terrestrial | Agarwal [123]                                   | <i>triedrus</i>       | KX698081 |
| <i>C. robustus</i>             | trunk       | Kraus [56]; herein                              | <i>louisadensis</i>   | JX440554 |
| <i>C. roesleri</i>             | karst       | Ziegler et al. [124]                            | <i>angularis</i>      | HLM 0333 |
| <i>C. rosichonarieforum</i>    | swamp       | Riyanto et al. [47]                             | <i>agamensis</i>      | KP256188 |
| <i>C. rubidus</i>              | general     | Annandale [65]; Chandramouli [125]              | <i>lateralis</i>      | KM255203 |
| <i>C. russelli</i>             | general     | Grismer et al. [101]                            | <i>peguensis</i>      | JX440555 |
| <i>C. sadanensis</i>           | karst       | Grismer et al. [2]                              | <i>yathepyanensis</i> | MF872324 |
| <i>C. sadansinensis</i>        | karst       | Grismer et al. [2]                              | <i>sadansinensis</i>  | MF872325 |
| <i>C. sadleiri</i>             | general     | Smith et al. [126]                              | <i>darmandvillei</i>  | MH105038 |
| <i>C. saiyok</i>               | general     | Aksornneam et al. [127]; Panitvong et al. [128] | <i>oldhami</i>        | MF872308 |
| <i>C. cf. saiyok</i>           | general     | herein                                          | <i>oldhami</i>        | MW713964 |
| <i>C. salomonensis</i>         | trunk       | Rösler et al. [129]                             | <i>louisadensis</i>   | JX440556 |
| <i>C. sangi</i>                | general     | Pauwels et al. [130]                            | <i>irregularis</i>    | MW713956 |
| <i>C. sanook</i>               | karst       | Pauwels et al. [131]                            | <i>oldhami</i>        | MW713973 |
| <i>C. sanpelensis</i>          | karst       | Grismer et al. [2]                              | <i>sadansinensis</i>  | MF872345 |
| <i>C. semenanjungensis</i>     | swamp       | Grismer and Leong [132]                         | <i>agamensis</i>      | JQ889177 |
| <i>C. semicinctus</i>          | general     | Harvey et al. [118]                             | <i>agamensis</i>      | KR921713 |
| <i>C. septentrionalis</i>      | general     | Agarwal et al. [67]                             | <i>khasiensis</i>     | MH971164 |
| <i>C. septimontium</i>         | granite     | Murdoch et al. [13]                             | <i>intermedius</i>    | MH940233 |
| <i>C. seribuatensis</i>        | intertidal  | Youmans and Grismer [133]                       | <i>darmandvillei</i>  | JX440557 |
| <i>C. sermowaiensis</i>        | general     | Rösler et al. [129]; Kraus and Weijola [11]     | <i>sermowaiensis</i>  | JQ820296 |
| <i>C. serratus</i>             | trunk       | herein                                          | <i>loriae</i>         | JQ820297 |
| <i>C. sp. West Sepik</i>       | trunk       | herein                                          | <i>loriae</i>         | MW713977 |
| <i>C. sharkari</i>             | karst       | Grismer et al. [81]                             | <i>pulchellus</i>     | KJ659853 |
| <i>C. shwetaungorum</i>        | karst       | Grismer et al. [2]                              | <i>linnwayensis</i>   | MF872353 |
| <i>C. sinyineensis</i>         | karst       | Grismer et al. [2]                              | <i>sinyineensis</i>   | MF872355 |
| <i>C. slowinskii</i>           | general     | Field notes at California Academy of Sciences   | <i>peguensis</i>      | JX440559 |

|                                   |          |                                                        |                       |          |
|-----------------------------------|----------|--------------------------------------------------------|-----------------------|----------|
| <i>C. soba</i>                    | general  | Batuwita and Bahir [61]                                | <i>triedrus</i>       | MW713938 |
| <i>C. sommerladi</i>              | karst    | Luu et al. [134]                                       | <i>angularis</i>      | MT953490 |
| <i>C. soni</i>                    | karst    | Le et al. [135]                                        | <i>chauquangensis</i> | MT953491 |
| <i>C. sonlaensis</i>              | karst    | Nguyen et al. [136]                                    | <i>chauquangensis</i> | MT953492 |
| <i>C. soudthichaki</i>            | karst    | Luu et al. [137]                                       | <i>angularis</i>      | MT953493 |
| <i>C. sp. CDS 2010</i>            | general  | herein                                                 | <i>agamensis</i>      | GU550728 |
| <i>C. sp. DMSSK 126</i>           | general  | herein                                                 | <i>triedrus</i>       | MW792063 |
| <i>C. sp. HLM0310</i>             | trunk    | herein                                                 | <i>khasiensis</i>     | MW713970 |
| <i>C. sp. HLM0313 Kubah</i>       | trunk    | herein                                                 | <i>philippinicus</i>  | MW792060 |
| <i>C. sp. HLM0316 Kon Ka Kinh</i> | trunk    | herein                                                 | <i>irregularis</i>    | MW713951 |
| <i>C. sp. HLM0324 Lomyen</i>      | cave     | herein                                                 | <i>angularis</i>      | MW713943 |
| <i>C. sp. HLM0349 Nahin</i>       | karst    | herein                                                 | <i>angularis</i>      | MW713944 |
| <i>C. sp. HLM0353 Nahin</i>       | general  | herein                                                 | <i>angularis</i>      | MW713946 |
| <i>C. sp. HLM0354 Kon Tum</i>     | general  | herein                                                 | <i>irregularis</i>    | MW713955 |
| <i>C. sp. HLM0357 Tham Pla</i>    | karst    | herein                                                 | <i>chauquangensis</i> | MW713961 |
| <i>C. sp. HLM0358 Krabi</i>       | General  | herein                                                 | <i>oldhami</i>        | MW713969 |
| <i>C. sp. HLM0360 Chanthaburi</i> | General  | herein                                                 | <i>intermedius</i>    | MW713966 |
| <i>C. sp. HLM0362 Khao Yai</i>    | General  | herein                                                 | <i>intermedius</i>    | MW713965 |
| <i>C. sp. HLM0365 Kon Ka Kinh</i> | General  | herein                                                 | <i>irregularis</i>    | MW713950 |
| <i>C. sp. HLM0366 Chu Mom Ray</i> | General  | herein                                                 | <i>irregularis</i>    | MW713954 |
| <i>C. sp. HLM0367 Loc Bac</i>     | General  | herein                                                 | <i>irregularis</i>    | MW713952 |
| <i>C. sp. HLM0368 Loc Bao</i>     | General  | herein                                                 | <i>irregularis</i>    | MW713978 |
| <i>C. sp. HLM0371 Ujung Kulon</i> | General  | herein                                                 | <i>marmoratus</i>     | MW792056 |
| <i>C. sp. HLM0372 Suan Phueng</i> | Arboreal | herein                                                 | <i>brevipalmatus</i>  | MW713960 |
| <i>C. sp. IA 2014</i>             | General  | I. Agarwal. Personal communication, 2019               | <i>peguensis</i>      | KM255181 |
| <i>C. sp. IA 2014</i>             | General  | I. Agarwal. Personal communication, 2019               | <i>khasiensis</i>     | KM255192 |
| <i>C. sp. IA 2014</i>             | Trunk    | I. Agarwal. Personal communication, 2019               | <i>peguensis</i>      | KM255196 |
| <i>C. sp. KAC 2015</i>            | General  | K. O'Connell. I. Agarwal. Personal communication, 2020 | <i>marmoratus</i>     | KR921689 |
| <i>C. sp. KAC 2015</i>            | General  | K. O'Connell. I. Agarwal. Personal communication, 2020 | <i>marmoratus</i>     | KR921697 |
| <i>C. sp. KAC 2015</i>            | General  | K. O'Connell. I. Agarwal. Personal communication, 2020 | <i>marmoratus</i>     | KR921699 |
| <i>C. sp. KAC 2015</i>            | General  | K. O'Connell. I. Agarwal. Personal communication, 2020 | <i>marmoratus</i>     | KR921700 |
| <i>C. sp. KAC 2015</i>            | General  | K. O'Connell. I. Agarwal. Personal communication, 2020 | <i>agamensis</i>      | KR921711 |
| <i>C. sp. KAC 2015</i>            | General  | K. O'Connell. I. Agarwal. Personal communication, 2020 | <i>marmoratus</i>     | KR921720 |
| <i>C. sp. Kai Islands</i>         | General  | Nielson and Oliver [138]                               | <i>darmandvillei</i>  | MF706380 |
| <i>C. sp. Kirirom</i>             | General  | herein                                                 | <i>intermedius</i>    | KT013114 |
| <i>C. sp. Mamberamo</i>           | Trunk    | herein                                                 | <i>novaeguineae</i>   | JQ820316 |
| <i>C. sp.</i>                     | General  | K. O'Connell. I. Agarwal. Personal communication, 2020 | <i>agamensis</i>      | MH248914 |
| <i>C. sp. nov.</i>                | karst    | Le et al. [104]                                        | <i>brevipalmatus</i>  | MW655790 |
| <i>C. sp. Mizoram</i>             | General  | Agarwal pers. comm., (2019)                            | <i>khasiensis</i>     | KM255197 |
| <i>C. sp. Mt Pekopekowana</i>     | Trunk    | Kraus [56]; herein                                     | <i>louisidensis</i>   | HQ401193 |
| <i>C. sp. Song Thanh</i>          | General  | herein                                                 | <i>irregularis</i>    | MW713949 |
| <i>C. sp. Yingjiang</i>           | Karst    | herein                                                 | <i>khasiensis</i>     | MW792064 |
| <i>C. sp. Timor</i>               | General  | Nielsen and Oliver [138]                               | <i>darmandvillei</i>  | JX440560 |
| <i>C. sp. WAMR 109089</i>         | General  | Riyanto et al. [110]                                   | <i>darmandvillei</i>  | KU232625 |
| <i>C. sp. WAMR 109893</i>         | General  | Riyanto et al. [110]                                   | <i>darmandvillei</i>  | KU232621 |
| <i>C. sp. WAMR 112000</i>         | General  | herein                                                 | <i>darmandvillei</i>  | KU232624 |

|                              |             |                                                           |                       |          |
|------------------------------|-------------|-----------------------------------------------------------|-----------------------|----------|
| <i>C. sp. Tak</i>            | Granite     | herein                                                    | <i>sinyineensis</i>   | MT468903 |
| <i>C. sp. Tak</i>            | Karst       | herein                                                    | <i>sinyineensis</i>   | MT468901 |
| <i>C. sp. Kamphaeng Phet</i> | Granite     | herein                                                    | <i>sinyineensis</i>   | MT497807 |
| <i>C. sp. Tham</i>           | Granite     | herein                                                    | <i>chauquangensis</i> | MT468908 |
| <i>C. speciosus</i>          | terrestrial | Agarwal and Karanth [4]                                   | <i>triedrus</i>       | KM878623 |
| <i>C. cf. speciosus</i>      | terrestrial | Mirza et al. [38]; Agarwal and Karanth [4]                | <i>triedrus</i>       | KM878629 |
| <i>C. spelaeus</i>           | karst       | herein                                                    | <i>chauquangensis</i> | MW713962 |
| <i>C. spinosus</i>           | arboreal    | Linkem et al. [139]                                       | orphan                | MT953494 |
| <i>C. srilekhae</i>          | terrestrial | Agarwal [123]                                             | <i>triedrus</i>       | KX698084 |
| <i>C. sumuroi</i>            | general     | Welton et al. [3]                                         | <i>philippinicus</i>  | GU550772 |
| <i>C. sworderi</i>           | general     | Grismer [30]                                              | <i>sworderi</i>       | JQ889189 |
| <i>C. takouensis</i>         | granite     | Ngo and Bauer [54]                                        | <i>irregularis</i>    | MF169978 |
| <i>C. tanim</i>              | karst       | Nielsen and Oliver [138]                                  | <i>capreoloides</i>   | MF706378 |
| <i>C. taungwineensis</i>     | karst       | Grismer et al. [49]                                       | <i>sinyineensis</i>   | MN534925 |
| <i>C. tautbatorum</i>        | general     | Welton et al. [8]                                         | <i>philippinicus</i>  | GU550752 |
| <i>C. taybacensis</i>        | karst       | Pham et al. [140]                                         | <i>chauquangensis</i> | MT953495 |
| <i>C. taynguyenensis</i>     | general     | Nguyen et al. [115]                                       | <i>irregularis</i>    | MW792059 |
| <i>C. tebuensis</i>          | general     | Grismer et al. [141]                                      | <i>sworderi</i>       | JX988528 |
| <i>C. teynieii</i>           | karst       | David et al. [142]                                        | <i>angularis</i>      | MT953496 |
| <i>C. thirakhupti</i>        | karst       | Pauwels et al. [143]; herein                              | <i>oldhami</i>        | AP018115 |
| <i>C. thylacodactylus</i>    | terrestrial | Murdoch et al. [13]; herein                               | <i>intermedius</i>    | KT013163 |
| <i>C. tibetanus</i>          | general     | K. Wang. Personal communication, 2019                     | <i>tibetanus</i>      | YPX1413  |
| <i>C. cf. tibetanus</i>      | general     | Shi and Zhao [144]; K. Wang. Personal communication, 2019 | <i>tibetanus</i>      | JX440561 |
| <i>C. tigroides</i>          | karst       | Bauer et al. [35]; Aksornneam [127]                       | orphan                | JX440562 |
| <i>C. timur</i>              | granite     | Grismer et al. [81]                                       | <i>pulchellus</i>     | KJ659857 |
| <i>C. tiomanensis</i>        | granite     | J. Grismer et al. [145]                                   | <i>agamensis</i>      | GU550734 |
| <i>C. triedrus</i>           | terrestrial | herein                                                    | <i>triedrus</i>       | MW713937 |
| <i>C. cf. triedrus</i>       | terrestrial | Agarwal and Karanth [4]; Botejue and Wattavidanage [146]  | <i>triedrus</i>       | JX440522 |
| <i>C. cf. triedrus</i>       | terrestrial | herein                                                    | <i>triedrus</i>       | MW713941 |
| <i>C. trilatofasciatus</i>   | granite     | Grismer et al. [10]                                       | <i>pulchellus</i>     | JX519530 |
| <i>C. tripartitus</i>        | trunk       | Kraus [56]                                                | <i>louisianensis</i>  | JQ820317 |
| <i>C. tripuraensis</i>       | general     | I. Agarwal. Personal communication, 2019                  | <i>khassiensis</i>    | KM255183 |
| <i>C. tuberculatus</i>       | general     | Shea et al. [1]; Worthington et al. [147]                 | <i>tuberculatus</i>   | KT363943 |
| <i>C. urbanus</i>            | granite     | Purkayastha et al. [148]                                  | <i>khassiensis</i>    | MN911174 |
| <i>C. varadgirii</i>         | terrestrial | Agarwal et al. [149]                                      | <i>triedrus</i>       | KX632368 |
| <i>C. vilaphongi</i>         | karst       | Schneider et al. [42]; Luu et al. [137]                   | <i>chauquangensis</i> | MT953497 |
| <i>C. wayakonei</i>          | karst       | Nguyen et al. [150]; Yuan and Rao [151]; Luu et al. [137] | <i>chauquangensis</i> | MT953498 |
| <i>C. weltpyanensis</i>      | karst       | Grismer et al. [2]                                        | <i>sinyineensis</i>   | MF872360 |
| <i>C. yakhuna</i>            | terrestrial | Deraniyagala [152]                                        | <i>triedrus</i>       | MW713942 |
| <i>C. yangbayensis</i>       | granite     | Ngo and Chan [153]                                        | <i>irregularis</i>    | KT013202 |
| <i>C. cf. yangbayensis</i>   | karst       | Ngo and Chan [153]                                        | <i>irregularis</i>    | MF169968 |
| <i>C. yathepyanensis</i>     | karst       | Grismer et al. [2]                                        | <i>yathepyanensis</i> | MF872363 |
| <i>C. yoshii</i>             | trunk       | Hikida [19]                                               | <i>philippinicus</i>  | JX440565 |
| <i>C. ywanganensis</i>       | karst       | Grismer et al. [154]                                      | <i>linnwayensis</i>   | MH607610 |
| <i>C. zebriacus</i>          | general     | Taylor [155]; herein                                      | <i>oldhami</i>        | MW713971 |
| <i>C. zhaoermi</i>           | general     | Shi and Zhao [144]                                        | <i>tibetanus</i>      | YPX1433  |
| <i>C. zhenkangensis</i>      | karst       | Liu and Rao [156]                                         | <i>chauquangensis</i> | MW792062 |
| <i>C. zieglerei</i>          | general     | Nazarov et al. [78]                                       | <i>irregularis</i>    | HLM0305  |
| <i>C. cf. zieglerei</i>      | general     | herein                                                    | <i>irregularis</i>    | HLM0345  |
| <i>C. zugi</i>               | trunk       | Oliver et al. [157]                                       | <i>novaeguineae</i>   | JQ820306 |
